# Supplementary material
Source: PubMed Central journal article supplement (PMC5913410)
Supplement: BPH-175-1590-s001.pdf [file BPH-175-1590-s001.pdf]

**1,3,6,7-tetrahydroxy-8-prenylxanthone ameliorates  
inflammatory responses resulting from the paracrine  
interaction of adipocytes and macrophages**

**Running title: A xanthone abates adipose tissue inflammation**

Dan Li<sup>1</sup>, Qianyu Liu<sup>1</sup>, Wen Sun<sup>1</sup>, Xiuping Chen<sup>1</sup>, Ying Wang<sup>1</sup>, Yuxiang Sun<sup>2</sup>, & Ligen Lin<sup>1,\*</sup>

<sup>1</sup>State Key Laboratory of Quality Research in Chinese Medicine, Institute of Chinese Medical Sciences, University of Macau, Taipa, Macau, China and <sup>2</sup>Department of Nutrition and Food Science, Texas A&M University, College Station, TX, USA

**\* Correspondence**

Ligen Lin, Institute of Chinese Medical Sciences, University of Macau, Avenida da Universidade, Taipa, Macau, China; Tel.: 853 88228041; fax: 853 28841358. E-mail: ligenl@umac.mo.

**Table S1. Real-Time PCR primer sequences.**

| Gene           | Forward                   | Reverse                   |
|----------------|---------------------------|---------------------------|
| 18s            | AGCCTGCGGCTTAATTTGAC      | CAACTAAGAACGGCCATGCA      |
| Arginase-1     | CTCCAAGCCAAAGTCCTTAGAG    | AGGAGCTGTCATTAGGGACATC    |
| Ccl5           | TGCAGAGGACTCTGAGACAGC     | GAGTGGTGTCCGAGCCATA       |
| Ccl11          | AGAGCTCCACAGCGCTTCT       | GCAGGAAGTTGGGATGGA        |
| CD11c          | CTGGATAGCCTTTCTTCTGCTG    | GCACACTGTGTCCGAACTC       |
| CD206          | CAGGTGTGGGCTCAGGTAGT      | TGTGGTGAGCTGAAAGGTGA      |
| CD44           | CCAGGCTTTCAACAGTACCTTACC  | CTGAGGCATTGAAGCAATATGTGTC |
| CD68           | CCTTATGGACAGCTTACCTTTGG   | CTGAGCAGCCTGTAGCCTTAGAG   |
| COX-2          | CCACCTCTGCGATGCTCTTC      | CATTCCCCACGGTTTTGACATG    |
| Cx3cl1         | CATCCGCTATCAGCTAAACCA     | CAGAAGCGTCTGTGCTGTGT      |
| Cxcl10         | GCTGCCGTCATTTTCTGC        | TCTCACTGGCCCGTCATC        |
| F4/80          | CTTTGGCTATGGGCTTCCAGTC    | GCAAGGAGGACAGAGTTTATCGTG  |
| IFN- $\gamma$  | GTCATTGAAAGCCTAGAAAGTCTGA | CTGTGGGTTGTTGACCTCAAACCT  |
| IL-1 $\beta$   | TGTTCTTTGAAGTTGACGGACCC   | TCATCTCGGAGCCTGTAGTGC     |
| IL- 6          | CCAGAGATACAAAGAAATGATGG   | ACTCCAGAAGACCAGAGGAAAT    |
| iNOS           | CCAAGCCCTCACCTACTTCC      | CTCTGAGGGCTGACACAAGG      |
| MCP-1          | CAACTCTCACTGAAGCCAGCTC    | TAGCTCTCCAGCCTACTCATTGG   |
| MIP-1 $\alpha$ | CTTCTCTGTACCATGACACTCTGC  | ATTCAGTTCCAGGTCAGTGATGTAT |
| TNF- $\alpha$  | GAGAAAGTCAACCTCCTCTCTG    | GAAGACTCCTCCCAGGTATATG    |

**Table S2. Antibodies for immunoblotting.**

| Antibody                           | Source | Vendor                    | Catalog No. |
|------------------------------------|--------|---------------------------|-------------|
| anti-phospho-JNK                   | Mouse  | Santa Cruz Biotechnology  | sc-6254     |
| anti-JNK                           | Rabbit | Santa Cruz Biotechnology  | sc-571      |
| anti-phospho-p38                   | Rabbit | Cell Signaling Technology | #4511       |
| anti-p38                           | Rabbit | Cell Signaling Technology | #8690       |
| anti-phospho-ERK                   | Rabbit | Cell Signaling Technology | #4370       |
| anti-ERK                           | Rabbit | Cell Signaling Technology | #4695       |
| anti-phospho-NF- $\kappa$ B p65    | Rabbit | Cell Signaling Technology | #3033       |
| anti-NF- $\kappa$ B p65            | Rabbit | Cell Signaling Technology | #8242       |
| anti-phospho-IKK $\alpha/\beta$    | Rabbit | Cell Signaling Technology | #2697       |
| anti-IKK $\alpha$                  | Mouse  | Cell Signaling Technology | #11930      |
| anti-IKK $\beta$                   | Rabbit | Cell Signaling Technology | #8943       |
| anti-phospho-I $\kappa$ B $\alpha$ | Rabbit | Cell Signaling Technology | #2859       |
| anti-I $\kappa$ B $\alpha$         | Mouse  | Cell Signaling Technology | #4814       |
| anti-iNOS                          | Rabbit | Cell Signaling Technology | #13120      |
| anti-COX2                          | Rabbit | Cell Signaling Technology | #12282      |
| anti-SIRT3                         | Rabbit | Cell Signaling Technology | #5490       |
| anti-PPAR $\alpha$                 | Rabbit | Santa Cruz Biotechnology  | sc-9000     |
| anti-PPAR $\beta$                  | Rabbit | Santa Cruz Biotechnology  | sc-7197     |
| anti-PPAR $\gamma$                 | Rabbit | Santa Cruz Biotechnology  | sc-7196     |
| $\alpha$ -tubulin                  | Mouse  | Santa Cruz Biotechnology  | sc-8035     |
| GAPDH                              | Rabbit | Santa Cruz Biotechnology  | sc-25778    |
| Histone H3                         | Rabbit | Santa Cruz Biotechnology  | sc-10809    |

**Table S3. Compounds isolated from the pericarps of *Garcinia mangostana***

| No | Name                                  | Safety dosage<br>( $\mu\text{M}$ ) | Structure                                                                            |
|----|---------------------------------------|------------------------------------|--------------------------------------------------------------------------------------|
| 1  | garcinone E                           | 1.25                               | 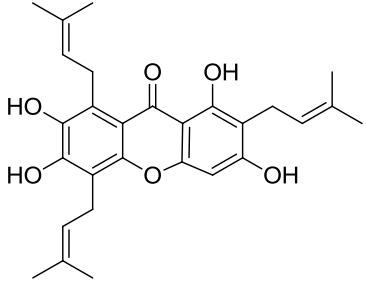   |
| 2  | 11-hydroxy-1-isomangostin             | 20                                 |    |
| 3  | 1,3,6,7-tetrahydroxy-8-prenylxanthone | 20                                 |   |
| 4  | mangosharin                           | 5                                  |  |
| 5  | gartanin                              | 2.5                                |  |
| 6  | 8-deoxygartanin                       | 2.5                                |  |

7 9-hydroxycalabaxanthone 2.5

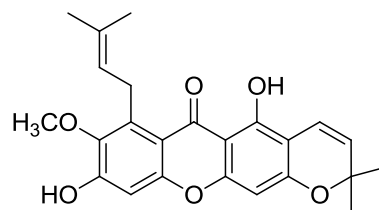

8 8-hydroxycudraxanthone G 5

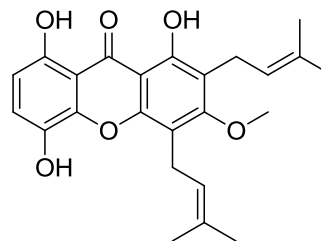

9 cudraxanthone G 10

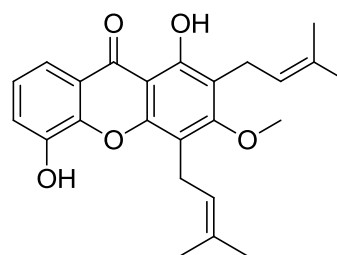

10 tovophylin A 2.5

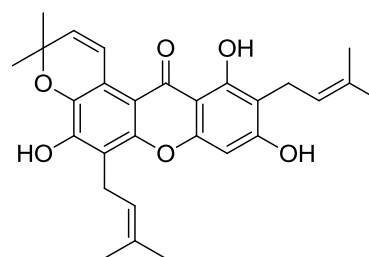

11 7-O-methylgarcinone E 5

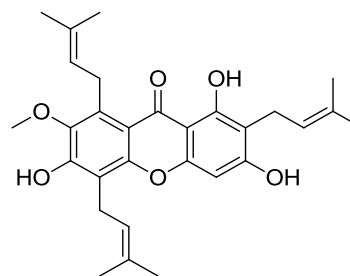

12 garcinone D 1.25

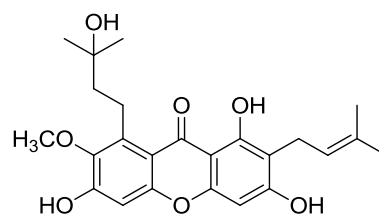

13 trapezifdixanthone

1.25

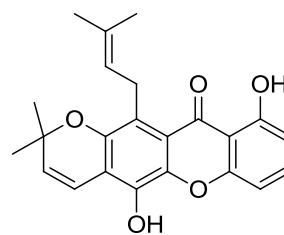

14 garcinone C

2.5

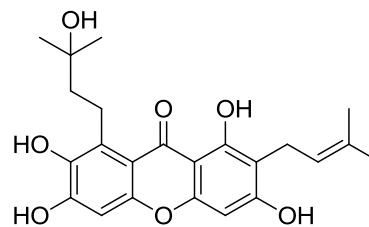



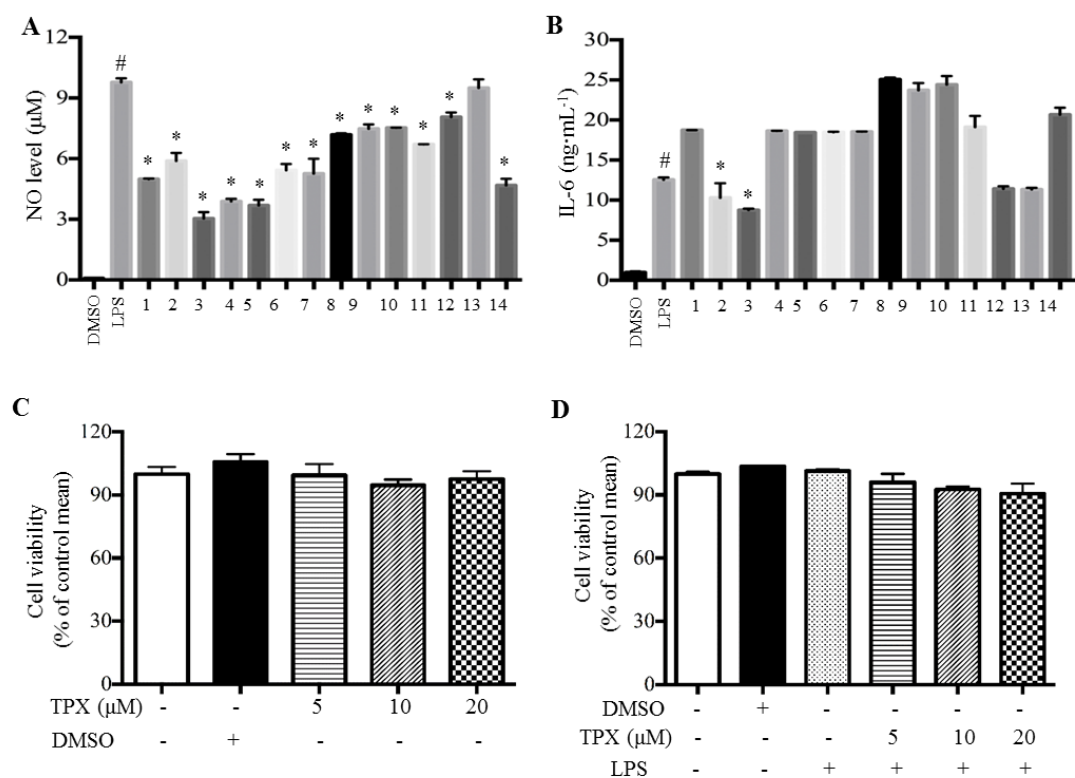

**Figure S2.** Screening of xanthenes in LPS stimulated RAW264.7 cells. Cells were treated with different compounds from *G. mangostana*, ranging from 1.25 to 20 µM in the presence of LPS (1 µg·mL<sup>-1</sup>). (A) NO production was determined using Griess reagent. (B) The levels of IL-6 were determined by ELISA kit. (C, D) The cytotoxicity of TPX on RAW264.7 cells with or without LPS. RAW264.7 cells were treated with TPX ranging from 5 to 20 µM in the presence or absence of LPS (1 µg·mL<sup>-1</sup>) for 24h. Cell viability was determined by MTT assay. Data are normalized to the mean value of control group. **1**, 1.25 µM; **2**, 20 µM; **3**, 20 µM; **4**, 5 µM; **5**, 5 µM; **6**, 2.5 µM; **7**, 2.5 µM; **8**, 5 µM; **9**, 10 µM; **10**, 2.5 µM; **11**, 5 µM; **12**, 1.25 µM; **13**, 1.25 µM; **14**, 2.5 µM. Data are expressed as means ± SEM ( $n = 9$ ). # $P < 0.05$  vs. DMSO, \* $P < 0.05$  vs. LPS.



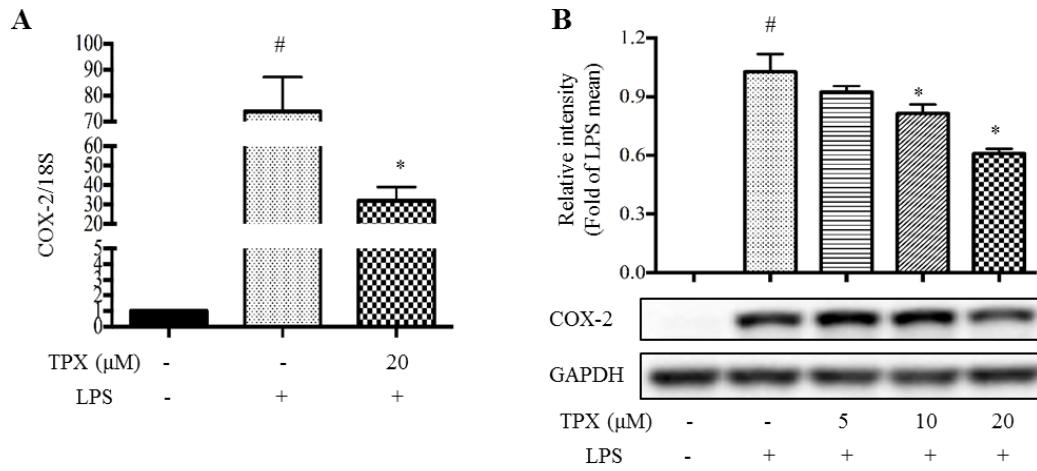

**Figure S3.** TPX inhibited LPS-induced COX-2 expression in RAW264.7 cells. (A) Cells were pretreated with the vehicle or TPX (20  $\mu\text{M}$ ) for 1h before treatment with LPS (1  $\mu\text{g}\cdot\text{mL}^{-1}$ ) for 6h. The mRNA levels of COX-2 were analyzed by real-time qRT-PCR, normalized by 18S. (B) The protein level COX-2 was detected by Western blot analysis. Data are normalized to the mean value of LPS group. GAPDH was used as an internal loading control. Data are expressed as means  $\pm$  SEM ( $n = 6$ ). <sup>#</sup> $P < 0.05$  vs. DMSO, <sup>\*</sup> $P < 0.05$  vs. LPS.

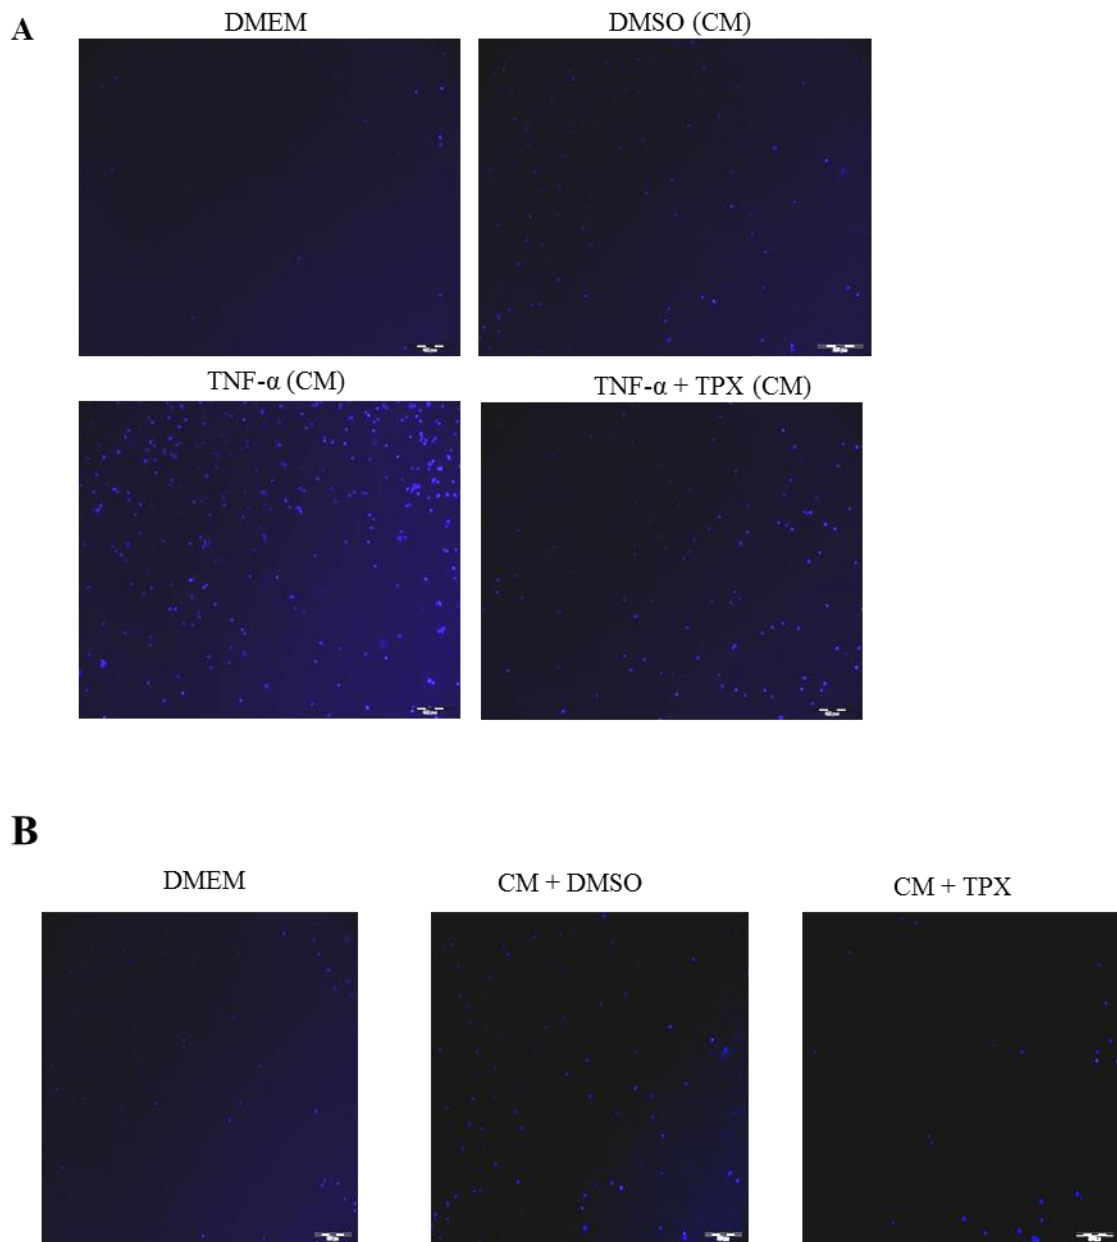

**Figure S4.** Transwell assay of macrophage migration. (A) Representative images of migrated macrophages in Figure 5A. (B) Representative images of migrated macrophages in Figure 5B.

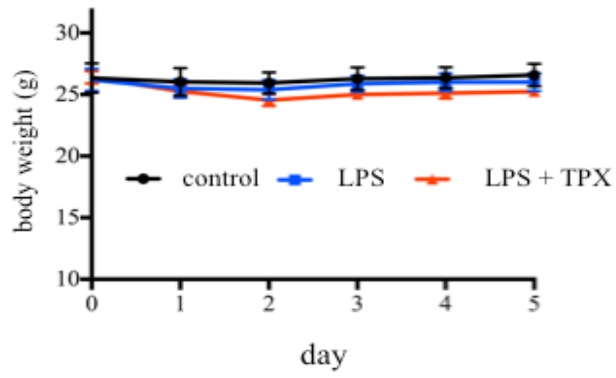

**Figure S5.** Effects of TPX on body weight in LPS-treated mice. Data are expressed as means  $\pm$  SEM ( $n = 7$ ).

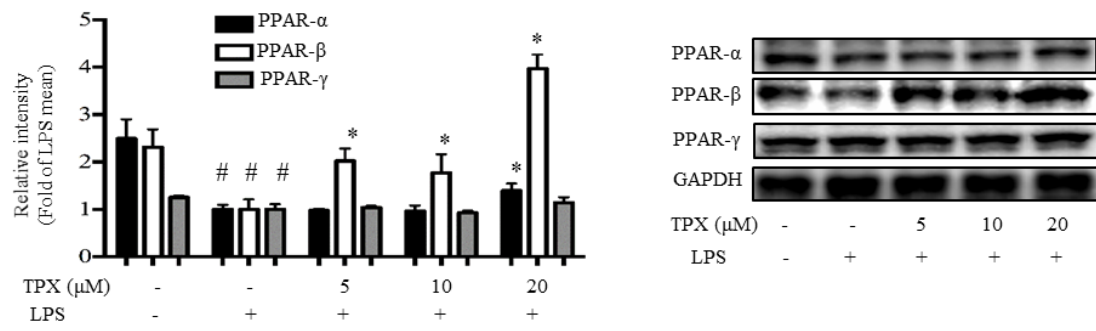

**Figure S6.** The protein expressions of PPARs were determined by Western blotting and GAPDH was used as an internal loading control. Data are normalized to the mean value of LPS group. Data are expressed as means  $\pm$  SEM ( $n=5$ ). # $P < 0.05$  vs. DMSO, \* $P < 0.05$  vs. LPS.

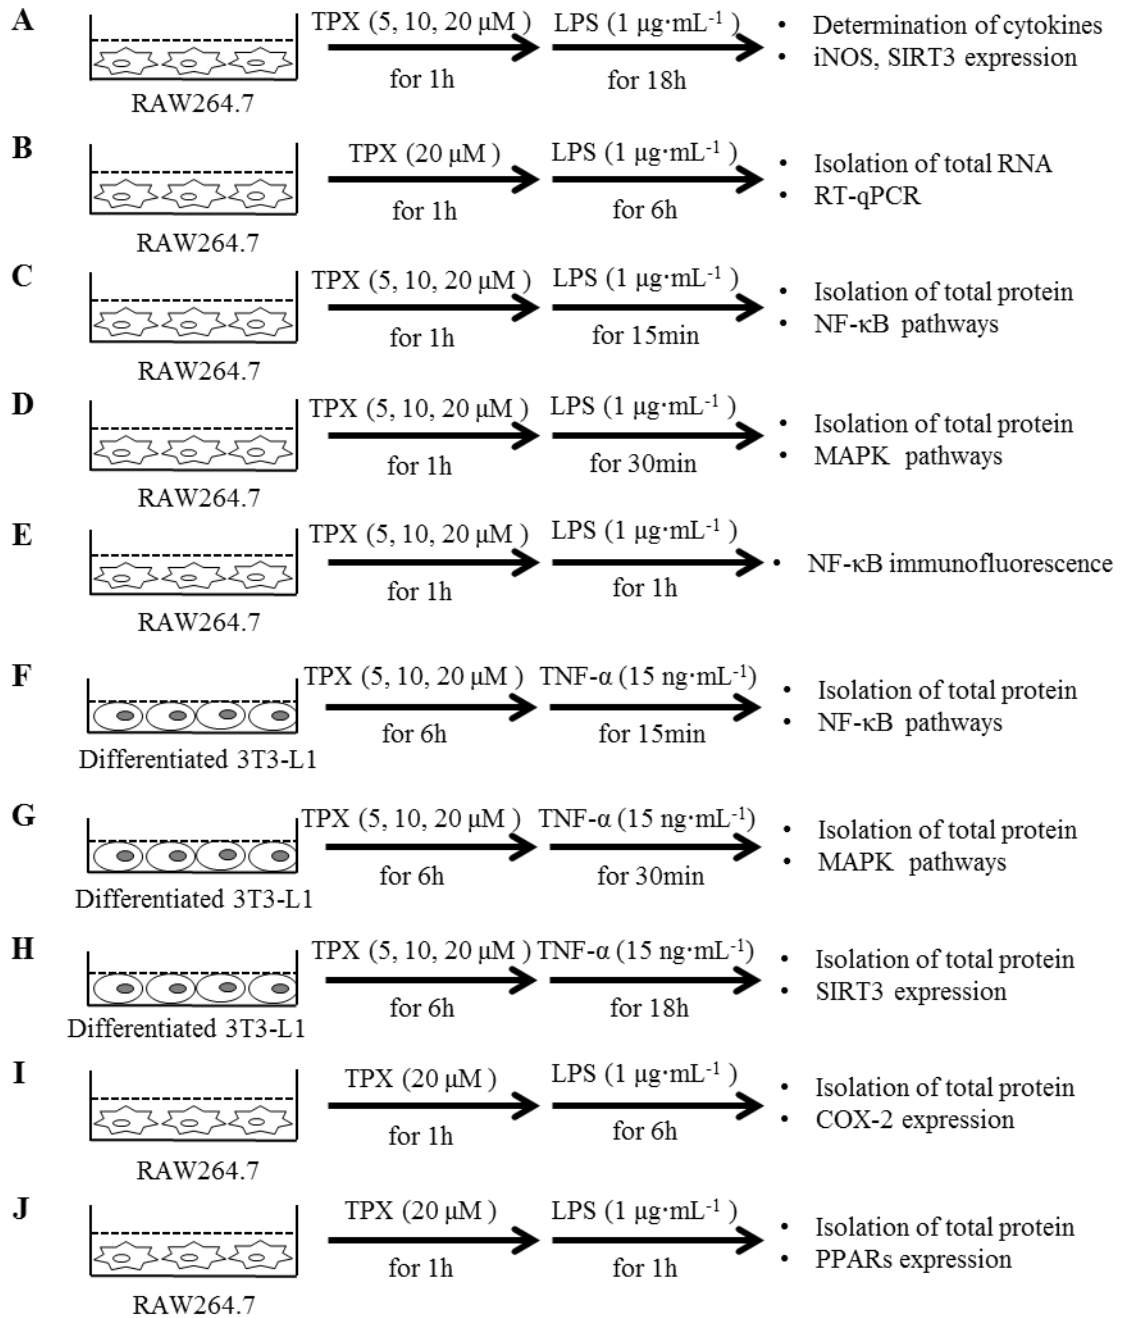

**Figure S7.** Schematic diagram of the *in vitro* experimental designs.
